# Supplementary material for: A Deformable Generic 3D Model of Haptoral Anchor of Monogenean
Source: PLoS One. 2013 Oct 28;8(10):e77650. doi: 10.1371/journal.pone.0077650 (PMC3810373; doi:10.1371/journal.pone.0077650)
Supplement: Table S2 — Cartesian coordinates X, Y & Z for each vertex on the preliminary generic 3D anchor (manually derived from Cartesian graph paper). (DOC) [file pone.0077650.s002.doc]

**Table S2. Cartesian coordinates X, Y & Z for each vertex on the preliminary generic 3D anchor (manually derived from Cartesian graph paper).**

| Set | Vertices | Coordinates-X | Coordinates-Y | Coordinates-Z |
| --- | --- | --- | --- | --- |
| 1 | 1 | -1.2 | 0 | 9.9 |
| 2 | -1 | 0 | 10.1 |
| 3 | -1 | -0.5 | 10.1 |
| 4 | -1.2 | -0.5 | 9.9 |
| 2 | 5 | -1.13 | 0 | 9.6 |
| 6 | -0.75 | 0 | 9.8 |
| 7 | -0.75 | -0.5 | 9.8 |
| 8 | -1.13 | -0.5 | 9.6 |
| 3 | 9 | -0.95 | 0.1 | 9.2 |
| 10 | -0.5 | 0.1 | 9.4 |
| 11 | -0.5 | -0.6 | 9.4 |
| 12 | -0.95 | -0.6 | 9.2 |
| 4 | 13 | -0.85 | 0.1 | 8.8 |
| 14 | -0.3 | 0.1 | 9 |
| 15 | -0.3 | -0.6 | 9 |
| 16 | -0.85 | -0.6 | 8.8 |
| 5 | 17 | -0.67 | 0.15 | 8.3 |
| 18 | -0.05 | 0.15 | 8.5 |
| 19 | -0.05 | -0.65 | 8.5 |
| 20 | -0.67 | -0.65 | 8.3 |
| 6 | 21 | -0.55 | 0.2 | 7.8 |
| 22 | 0.2 | 0.2 | 8 |
| 23 | 0.2 | -0.7 | 8 |
| 24 | -0.55 | -0.7 | 7.8 |
| 7 | 25 | -0.4 | 0.25 | 7.2 |
| 26 | 0.55 | 0.25 | 7.4 |
| 27 | 0.55 | -0.75 | 7.4 |
| 28 | -0.4 | -0.75 | 7.2 |
| 8 | 29 | -0.5 | 0.4 | 6.5 |
| 30 | 0.95 | 0.4 | 6.8 |
| 31 | 0.95 | -0.9 | 6.8 |
| 32 | -0.5 | -0.9 | 6.5 |
| 9 | 33 | -0.4 | 0.5 | 5.7 |
| 34 | 1.4 | 0.5 | 6.05 |
| 35 | 1.4 | -1 | 6.05 |
| 36 | -0.4 | -1 | 5.7 |
| 10 | 37 | -0.3 | 0.5 | 5.3 |
| 38 | 1.4 | 0.5 | 5.6 |
| 39 | 1.4 | -1 | 5.6 |
| 40 | -0.3 | -1 | 5.3 |
| 11 | 41 | 0 | 0.4 | 4.6 |
| 42 | 1.15 | 0.4 | 4.8 |
| 43 | 1.15 | -0.9 | 4.8 |
| 44 | 0 | -0.9 | 4.6 |
| 12 | 45 | 0.05 | 0.4 | 4 |
| 46 | 1 | 0.4 | 4 |
| 47 | 1 | -0.9 | 4 |
| 48 | 0.05 | -0.9 | 4 |
| 13 | 49 | 0.1 | 0.2 | 3.2 |
| 50 | 0.9 | 0.2 | 3.2 |
| 51 | 0.9 | -0.7 | 3.2 |
| 52 | 0.1 | -0.7 | 3.2 |
| 14 | 53 | 0.1 | 0.2 | 2.5 |
| 54 | 0.8 | 0.2 | 2.5 |
| 55 | 0.8 | -0.7 | 2.5 |
| 56 | 0.1 | -0.7 | 2.5 |
| 15 | 57 | -0.1 | 0.1 | 1.9 |
| 58 | 0.6 | 0.1 | 1.9 |
| 59 | 0.6 | -0.6 | 1.9 |
| 60 | -0.1 | -0.6 | 1.9 |
| 16 | 61 | -0.4 | 0.1 | 1.2 |
| 62 | 0.3 | 0.1 | 1.1 |
| 63 | 0.3 | -0.6 | 1.1 |
| 64 | -0.4 | -0.6 | 1.2 |
| 17 | 65 | -0.7 | 0.1 | 0.8 |
| 66 | -0.2 | 0.1 | 0.4 |
| 67 | -0.2 | -0.6 | 0.4 |
| 68 | -0.7 | -0.6 | 0.8 |
| 18 | 69 | -1.0 | 0 | 0.5 |
| 70 | -1 | 0 | 0 |
| 71 | -1 | -0.5 | 0 |
| 72 | -1 | -0.5 | 0.5 |
| 19 | 73 | -1.5 | 0 | 0.9 |
| 74 | -1.5 | 0 | 0.3 |
| 75 | -1.5 | -0.5 | 0.3 |
| 76 | -1.5 | -0.5 | 0.9 |
| 20 | 77 | -2 | 0 | 1.55 |
| 78 | -2 | 0 | 0.95 |
| 79 | -2 | -0.5 | 0.95 |
| 80 | -2 | -0.5 | 1.55 |
| 21 | 81 | -2.4 | 0 | 2.1 |
| 82 | -2.4 | 0 | 1.5 |
| 83 | -2.4 | -0.5 | 1.5 |
| 84 | -2.4 | -0.5 | 2.1 |
| 22 | 85 | -2.8 | -0.1 | 2.7 |
| 86 | -2.8 | -0.1 | 2.3 |
| 87 | -2.8 | -0.4 | 2.3 |
| 88 | -2.8 | -0.4 | 2.7 |
| 23 | 89 | -3.4 | -0.2 | 3.5 |
| 90 | -3.4 | -0.2 | 3.3 |
| 91 | -3.4 | -0.3 | 3.3 |
| 92 | -3.3 | -0.3 | 3.5 |
